# Supplementary material
Source: HighWire-hosted journal article supplement (https://jitc.bmj.com/content/8/2/e001358)
Supplement: inline-supplementary-material-10 [file inline-supplementary-material-10.xlsx]

## Sheet: YTN16_top_500_genes
Supplementary Table 9. KEGG pathway analysis of genes highly expressed in YTN16 cell line.
Pathway	P	Genes
Chemical carcinogenesis	0.00505329	Cyp2c66, Cyp2c65, Cyp2c37, Gstm3, Adh1, Cyp2c68, Cyp2c29
Serotonergic synapse	0.00777205	Cyp2c66, Cyp2c65, Cyp2c37, Cyp2c68, Htr7, Cyp2c29, Htr2b, Cacna1b
Linoleic acid metabolism	0.0106489	Cyp2c66, Cyp2c65, Cyp2c37, Cyp2c68, Cyp2c29
Retinol metabolism	0.0187156	Cyp2c66, Cyp2c65, Cyp2c37, Adh1, Cyp2c68, Cyp2c29
